# Supplementary material
Source: PubMed Central journal article supplement (PMC3811646)

**SUPPLEMENTAL INFORMATION:****Multidrug-resistant tuberculosis in Panama is driven by clonal expansion of an MDR-TB strain related to the KZN XDR-TB strain from South Africa**

Fedora Lanzas, Petros C. Karakousis, James C. Sacchetti, Thomas R. Ioerger

**Table S1.** Sequencing statistics, spoligotype, and resistance-related polymorphisms for each isolate in the sample (see attached spreadsheet). The isolates are presented in the same order as in the phylogenetic tree (Figure 1), and are grouped by cluster using color.

**Table S2.** Mutations at sites other than S315 in KatG among INH-resistant isolates.

| KatG:S315T* | InhA:c-15t | num. | num. with polymorphisms in KatG other than at S315 | polymorphisms in KatG other than at S315                               |
|-------------|------------|------|----------------------------------------------------|------------------------------------------------------------------------|
| -           | -          | 10   | 8                                                  | T275I, A379V+W328R**, D94G (2), T766P+G125I, W198stop, Q722stop, W300R |
| -           | +          | 9    | 5                                                  | T380I, W191R (2), Y304C, L617F                                         |
| +           | -          | 47   | 1                                                  | P136A                                                                  |
| +           | +          | 4    | 0                                                  | none                                                                   |

\*S315G is counted as S315T; the case with the large-scale deletion of KatG is excluded.

\*\*Note that some strains had more than one amino acid substitution in KatG.

**Table S3.** List of polymorphisms uniquely associated with cluster LAM9-c1.

|                     |                      |                    |                     |
|---------------------|----------------------|--------------------|---------------------|
| Rv0003/recF:V54I    | Rv1132:L353R         | Rv1865c:G208R      | 3503219:G>A         |
| Rv0045c:W45*        | Rv1138c:G48R         | Rv1868:T9P         | 3542064:C>T         |
| 130864:C>T          | Rv1161/narG:D253N    | 2198554:A>C        | 3546879:A>C         |
| Rv0138:V35V         | Rv1183/mmpL10:D560D  | 2219567:A>C        | Rv3190c:G394A       |
| Rv0194:A302T        | Rv1185c/fadD21:P548P | Rv2025c:I127T      | Rv3223c/sigH:G16R   |
| Rv0209:H313R        | Rv1188:I244V         | Rv2036:A209V       | Rv3239c:S95F        |
| Rv0231/fadE4:M148T  | Rv1238/sugC:A385P    | Rv2043c/pncA:G16G  | Rv3297/nei:I111F    |
| Rv0233/nrdB:A295E   | Rv1251c:G629R        | 2307576:C>T        | Rv3329:V21F         |
| Rv0275c:A110V       | Rv1254:V37V          | Rv2124c/metH:A310V | Rv3347c/PPE55:G711G |
| Rv0304c/PPE5:F1845S | Rv1286/cysN:A78A     | Rv2127/ansP1:A142P | Rv3391/acrA1:P615L  |
| Rv0329c:A142T       | Rv1292/argS:M91I     | Rv2212:A329T       | 3907020:A>C         |
| Rv0360c:S48*        | Rv1308/atpA:R142R    | Rv2305:L213L       | Rv3527:H28H         |
| Rv0467/icl:S142S    | 1475277:G>A          | Rv2307c:L101L      | Rv3529c:P115A       |
| 579212:T>A          | 1702851:G>A          | 2698312:G>A        | 4014057:G>T         |
| Rv0538:L226L        | 1718720:A>G          | Rv2495c/pdhC:S238S | Rv3602c/panC:G129G  |
| Rv0586:G213G        | Rv1539/lspA:P2S      | Rv2510c:A14A       | Rv3663c/dppD:H195H  |
| Rv0624:S13T         | Rv1547/dnaE:A1031S   | Rv2515c:A81V       | Rv3671c:P95Q        |
| Rv0667/rpoB:A692T   | Rv1551/plsB1:P32A    | Rv2525c:G78G       | 4121585:G>C         |
| Rv0691c:E4E         | Rv1567c:F14F         | Rv2802c:R198W      | Rv3682/ponA2:P804P  |
| 812819:A>G          | Rv1619:H107Y         | Rv2876:L67L        | Rv3746c/PE34:S87L   |
| Rv0894:V383I        | Rv1747:D841D         | Rv2881c/cdsA:L125L | 4196579:C>T         |
| 1108545:G>A         | Rv1770:T370T         | Rv2905/lppW:V137G  | Rv3860:P389P        |
| Rv0997:T58T         | Rv1771:A116V         | Rv2948c/fadD22:R2W | Rv3877:T11I         |
| Rv1046c:A26V        | Rv1779c:E437E        | Rv3049c:V57I       | Rv3881c:Q431*       |
| Rv1052:G14S         | Rv1781c/malQ:R172H   | Rv3120:C71R        | Rv3882c:R431R       |

**Figure S1.** Maximum parsimony phylogenetic tree of drug-susceptible isolates, based on 7,955 SNPs from a multiple-genome alignment. The locations of the four major clusters of MDR isolates within the LAM family (from Figure 1) are highlighted in red.

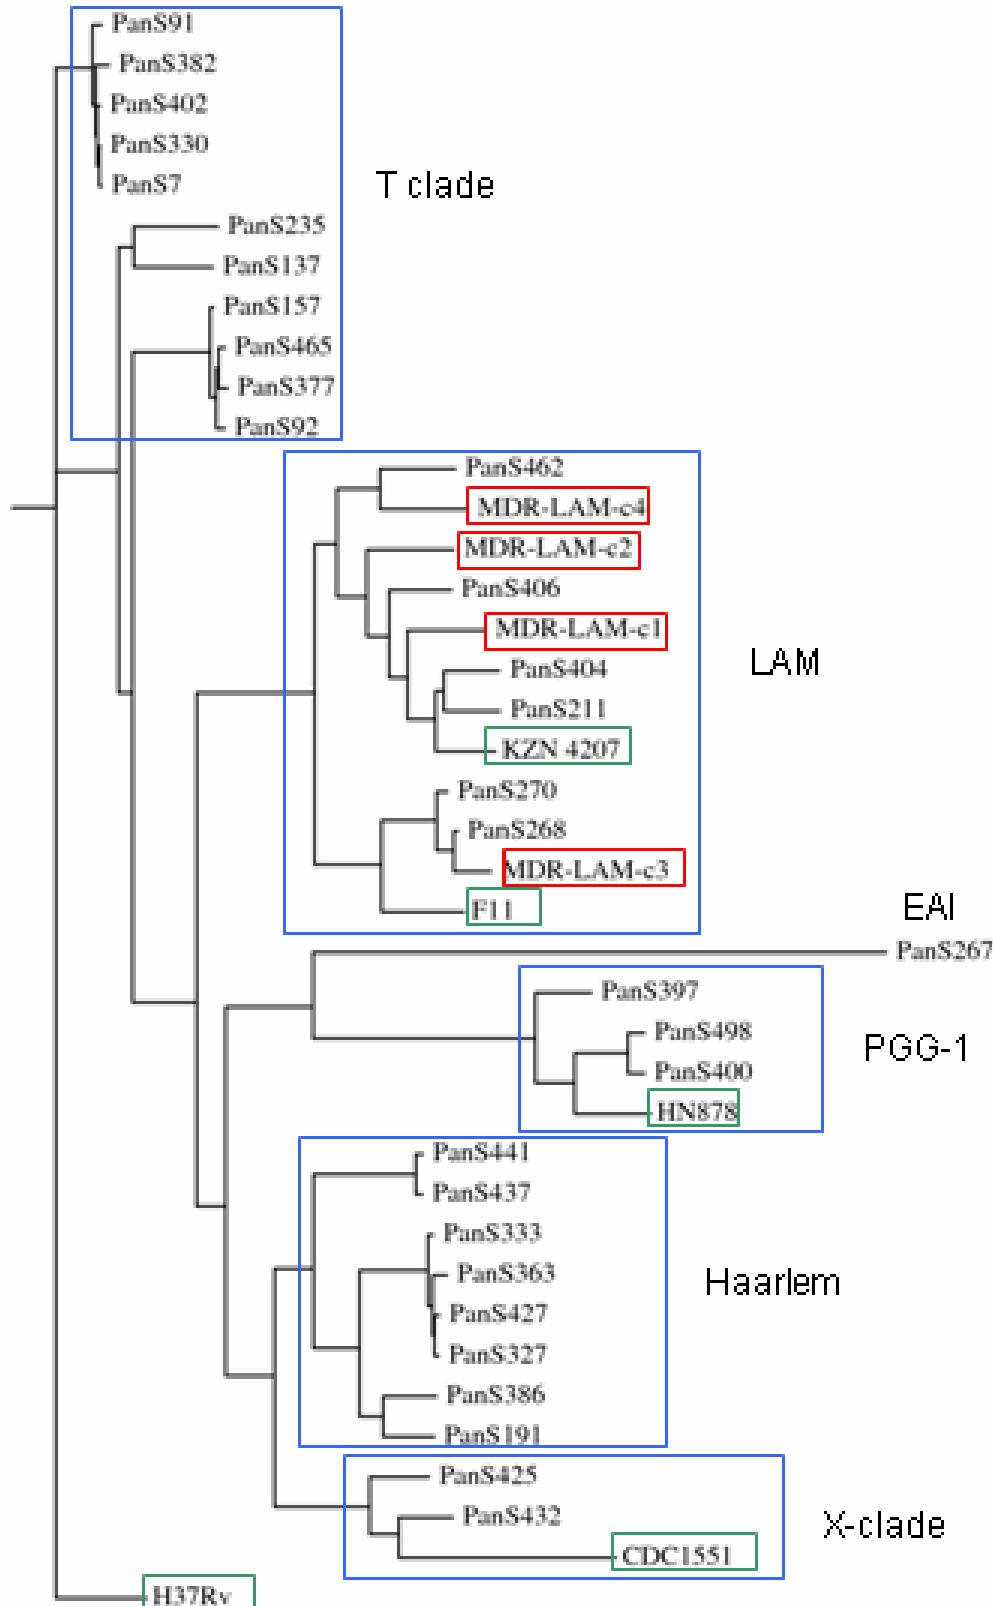

Supplement: JCM.01122-13_zjm999092816so1.pdf [file JCM.01122-13_zjm999092816so1.pdf]
